# Supplementary material for: Solid-Phase Extraction Embedded Dialysis (SPEED), an Innovative Procedure for the Investigation of Microbial Specialized Metabolites
Source: MDPI journal article supplement (doi:10.3390/md19070371), 2021-06-26
Supplement: s1 [file s1]

# Solid-Phase Extraction Embedded Dialysis (SPEED) an Innovative procedure for the Investigation of Microbial Specialized Metabolites

Phuong-Y MAI , Géraldine Le Goff, Erwan Poupon , Philippe Lopes , Xavier Moppert, Bernard Costa , Mehdi A. Beniddir, Jamal Ouazzani \*

## Supporting Information

### Table

**Table S1:** Table of hit compounds dereplicated by GNPS database

**Table S2** The hit list from the Dictionary of Natural Products® of 125 hit compounds of the molecular formula  $C_{18}H_{22}O_6$  and their biological source

### Figures

**Figure S1:** The molecular networking of the strain extracts from different condition cultures and the control extracts. Different culture condition is represented by different color code.

**Figure S2:** The molecular networking with dereplicated nodes that are mapped by rainbow color codes while others stayed purple.

**Figure S3:** The HRESIMS spectrum of antimycin A4a

**Figure S4:**  $^1H$  NMR spectrum of antimycin A4a in  $CDCl_3$  (500 MHz)

**Figure S5:** The HRESIMS spectrum of tetrodecamycin

**Figure S6:**  $^1H$  NMR spectrum of tetrodecamycin in  $CDCl_3$  (500 MHz)

**Figure S7:**  $^{13}C$  NMR spectrum of tetrodecamycin in  $CDCl_3$  (125 MHz)

**Figure S8:** The HRESIMS spectrum of 14-methylpentadecanoic acid

**Figure S9:**  $^1H$  NMR spectrum of 14-methylpentadecanoic acid in  $CDCl_3$  (500 MHz)

**Figure S10:**  $^{13}C$  NMR spectrum of 14-methylpentadecanoic acid in  $CDCl_3$  (125 MHz)

**Figure S11.** Further SPEED pictures

**Table S1.** Table of hit compounds dereplicated by GNPS database.

|          | Compound name                                                                                                                | Score | Biological source                          |
|----------|------------------------------------------------------------------------------------------------------------------------------|-------|--------------------------------------------|
| 912.6279 | Surugamide A                                                                                                                 | 0.78  | Marine-derived <i>Streptomyces</i> sp[1]   |
| 623.3375 | Desferrioxamine E                                                                                                            | 0.89  | <i>Streptomyces</i> species[2]             |
| 614.2724 | Ferrioxamine B                                                                                                               | 0.76  | Marine bacterium[3]                        |
| 601.3555 | Desferrioxamine E                                                                                                            | 0.84  | <i>Streptomyces</i> species[2]             |
| 587.3401 | Desmethylenynocardamine                                                                                                      | 0.83  | <i>Streptomyces</i> species[4]             |
| 585.3606 | Dehydroxynocardamine                                                                                                         | 0.83  | <i>Streptomyces</i> species[5]             |
| 561.3606 | Desferrioxamine                                                                                                              | 0.92  | <i>Streptomyces pilosus</i> ATCC 19797 [6] |
| 549.2809 | Antimycin A1                                                                                                                 | 0.81  | <i>Streptomyces</i> sp[7]                  |
| 547.3451 | N-[5-[[4-[4-[acetyl(hydroxy)amino]butylamino]-4-oxobutanoyl]-hydroxyamino]pentyl]-N'-(5-aminopentyl)-N'-hydroxybutanediamide | 0.87  | -                                          |
| 531.4093 | Didodecyl 3,3'-thiodipropionate oxide                                                                                        | 0.71  |                                            |
| 535.2652 | Antimycin A2                                                                                                                 | 0.83  | <i>Streptomyces</i> sp[7]                  |
| 521.2498 | Antimycin A3                                                                                                                 | 0.83  | <i>Streptomyces</i> sp[7]                  |
| 507.2338 | Antimycin A4                                                                                                                 | 0.75  | <i>Streptomyces</i> sp[7]                  |
| 461.2607 | 4-[5-[[4-[5-[acetyl(hydroxy)amino]pentylamino]-4-oxobutanoyl]-hydroxyamino]pentylamino]-4-oxobutanoic acid                   | 0.85  | -                                          |
| 443.2500 | 4-[5-[[4-[5-[acetyl(hydroxy)amino]pentylamino]-4-oxobutanoyl]-hydroxyamino]pentylamino]-4-oxobutanoic acid                   | 0.74  | -                                          |
| 425.1919 | Citreoviridin                                                                                                                | 0.72  | <i>Penicillium citreoviride</i> [8]        |
| 369.1252 | Tricresylphosphate                                                                                                           | 0.86  | -                                          |
| 367.1501 | 1-beta-D-Glucopyranosyl-L-tryptophan                                                                                         | 0.85  | -                                          |
| 314.09   | 5'-Deoxy-5'-(methylsulfinyl)adenosine                                                                                        | 0.86  | -                                          |
| 261.1234 | Cyclo(L-Tyr-L-Pro)                                                                                                           | 0.83  | <i>Streptomyces</i> sp[9]                  |
| 245.1286 | L-prolyl-L-phenylalanine                                                                                                     | 0.80  | -                                          |
| 188.0706 | L-Tryptophan                                                                                                                 | 0.91  | -                                          |
| 174.0551 | Quinoline-4-carboxylic acid                                                                                                  | 0.77  | -                                          |
| 169.0756 | Norharman                                                                                                                    | 0.95  | Plant and fungi metabolite[10]             |

**Table S2** The *hit list* from the Dictionary of Natural Products® of 125 hit compounds of the molecular formula C<sub>18</sub>H<sub>22</sub>O<sub>6</sub> and their biological source

| No. | compound name                                                                                                                                             | biological source                                                                                        |
|-----|-----------------------------------------------------------------------------------------------------------------------------------------------------------|----------------------------------------------------------------------------------------------------------|
| 1   | aigialomycin D                                                                                                                                            | <i>Aigialus parvus</i> BCC 5311 [11],<br><i>Fusarium</i> sp. LN-10 and<br><i>Paecilomyces</i> sp. SC0924 |
| 2   | aigialomycin E                                                                                                                                            | <i>Aigialus parvus</i> BCC 5311 [11]                                                                     |
| 3   | 2,2',4,4',5,5'-hexamethoxybiphenyl                                                                                                                        | -                                                                                                        |
| 4   | 2,2',4,4',6,6'-hexamethoxybiphenyl                                                                                                                        | -                                                                                                        |
| 5   | 1,2-Bis(4-hydroxy-3-methoxyphenyl)-1,3-propanediol;(1R,2R)-form,<br>1-Me ether                                                                            | <i>Phyllanthus glaucus</i> [12]                                                                          |
| 6   | 1,2-Bis(4-hydroxy-3-methoxyphenyl)-1,3-propanediol;(1R,2S)-form,<br>1-Me ether                                                                            | <i>Phyllanthus glaucus</i> [12]                                                                          |
| 7   | 1,2-Bis(4-hydroxy-3-methoxyphenyl)-1,3-propanediol;(1RS,2SR)-<br>form, 1-Me ether                                                                         | <i>Phyllanthus glaucus</i> [12]                                                                          |
| 8   | 1,2-Bis(4-hydroxy-3-methoxyphenyl)-1,3-propanediol;(1S,2R)-form,<br>1-Me ether                                                                            | <i>Phyllanthus glaucus</i> [12]                                                                          |
| 9   | 1,2-Bis(4-hydroxy-3-methoxyphenyl)-1,3-propanediol;(1S,2S)-form,<br>1-Me ether                                                                            | <i>Phyllanthus glaucus</i> [12]                                                                          |
| 10  | 1,2-Bis(3,4,5-trihydroxyphenyl)ethane; 3,3',4,4'-Tetra-Me ether                                                                                           | <i>Dendrobium cumulatum</i> [13]                                                                         |
| 11  | dihydrobyssochlamic acid                                                                                                                                  | <i>Byssochlamys fulva</i> [14]                                                                           |
| 12  | chaetaurin                                                                                                                                                | <i>Chaetomium aureum</i> [15]                                                                            |
| 13  | chermesinone C                                                                                                                                            | <i>Penicillium chermesinum</i> ZH4-<br>E2 [16]                                                           |
| 14  | combretastatin                                                                                                                                            | <i>Combretum caffrum</i> [17]                                                                            |
| 15  | cyclopaldic acid, 5-O-(3-methyl-2-butenyl), 3-Et ether                                                                                                    | <i>Aspergillus duricaulis</i> [18]                                                                       |
| 16  | 3,7'-cyclo-1,2,3,4-tetrahydro-1,8'-lign-8-ene-2,3,3',4,4',5-hexol                                                                                         | -                                                                                                        |
| 17  | 3,7'-Cyclo-1,2,3,4-tetrahydro-1,8'-lign-8-ene-2,3,3',4,4',5-hexol;<br>(1R*,3S*,4R*,7'R*,8'S*)-form                                                        | -                                                                                                        |
| 18  | 3,7'-Cyclo-1,2,3,4-tetrahydro-1,8'-lign-8-ene-2,3,3',4,4',5-hexol;<br>(1R*,3S*,4S*,7'R*,8'S*)-form                                                        | -                                                                                                        |
| 19  | 3,7'-Cyclo-1,2,3,4-tetrahydro-1,8'-lign-8-ene-2,3,3',4,4',5-hexol;<br>(1S,2S,3R,4S,7'S,8'R)-form                                                          | -                                                                                                        |
| 20  | cytosporone H                                                                                                                                             | <i>Paraphaeosphaeria quadrisepata</i><br>[19]                                                            |
| 21  | cytosporone G                                                                                                                                             | <i>Paraphaeosphaeria quadrisepata</i><br>[19]                                                            |
| 22  | cytosporone I                                                                                                                                             | <i>Paraphaeosphaeria quadrisepata</i><br>[19]                                                            |
| 23  | Neocosmosin B                                                                                                                                             | <i>Neocosmospora</i> sp. (UM-031509)<br>[20]                                                             |
| 24  | Monocillin V                                                                                                                                              | <i>Monocillium nordinii</i> [21]                                                                         |
| 25  | 9R-Hydroxymonocillin IV                                                                                                                                   | <i>Paecilomyces</i> sp. SC0924 [22]                                                                      |
| 26  | 3,5-Dihydroxy-4(15),10(14),11(13)-guaiatrien-12,8-olide;<br>(1 $\alpha$ ,3 $\alpha$ ,5 $\alpha$ ,8 $\alpha$ )-form, 10 $\alpha$ , 146epoxide, 3-propanoyl | <i>Arctotis grandis</i> and <i>Venidium</i><br><i>hirsutum</i>                                           |
| 27  | 3,5-Dihydroxy-4(15),10(14),11(13)-guaiatrien-12,8-olide;<br>(1 $\alpha$ ,3 $\beta$ ,5 $\alpha$ ,8 $\alpha$ )-form, 10 $\alpha$ , 146epoxide, 3-propanoyl  | <i>Arctotis arctotoides</i>                                                                              |
| 28  | 1,8-Dihydroxy-2-oxo-3,7(11)-eudesmadien-12,8-olide; (1 $\beta$ ,8 $\beta$ OH)-<br>form, 8-Me ether, 1-Ac                                                  | <i>Salvia plebeia</i>                                                                                    |
| 29  | 7-hydroxygerin                                                                                                                                            | <i>Saussurea cauloptera</i> [23]                                                                         |

|    |                                                                                                                            |                                       |
|----|----------------------------------------------------------------------------------------------------------------------------|---------------------------------------|
| 30 | carayensin A                                                                                                               | <i>Carya cathayensis</i> [24]         |
| 31 | 2-(3,4-Dihydroxyphenyl)-1-(3,4,5-trihydroxyphenyl)ethanol; (R)-form, $\alpha$ ,3,3',5-Tetra-Me ether (loddigesinols C)     | <i>Dendrobium loddigesii</i> [25]     |
| 32 | nobilin B                                                                                                                  | <i>Dendrobium nobile</i> [26]         |
| 33 | pithecellobiumol A                                                                                                         | <i>Pithecellobium clypearia</i> [27]  |
| 34 | combretol C                                                                                                                | <i>Combretum yunnanense</i> [28]      |
| 35 | 3,8-dimethyl-2-naphthol; O- $\beta$ -D-glucopyranoside                                                                     | <i>Hibiscus cannabinus</i> [29]       |
| 36 | 8,10-epoxy- <i>p</i> -mentha-1,3,5-triene-2,5,9-triol; 2-Me ether, 5-tigloyl, 9-Ac                                         | <i>Mikania species</i> [30]           |
| 37 | 4,7'-epoxy-3,4,5,6-tetrahydro-3,8'-lign-8-ene-3,3',4,4',6-pentol                                                           | -                                     |
| 38 | 4,7'-epoxy-3,4,5,6-tetrahydro-3,8'-lign-8-ene-3,3',4,4',6-pentol; (3R*,4R*,7'S*,8'S*)-form                                 | -                                     |
| 39 | 4,7'-epoxy-3,4,5,6-tetrahydro-3,8'-lign-8-ene-3,3',4,4',6-pentol; (3R*,4R*,7'S*,8'R*)-form                                 | -                                     |
| 40 | 4,7'-epoxy-3,4,5,6-tetrahydro-3,8'-lign-8-ene-3,3',4,4',6-pentol; (3S,4R,6S,7'S,8'R)-form                                  | -                                     |
| 41 | 6'-hydroxypestalotiopsone C                                                                                                | <i>Acremonium strictum</i> [31]       |
| 42 | dihydroepiheveadride                                                                                                       | Unidentified fungus IFM 52672 [32]    |
| 43 | 4'-O-Acetylsinapyl angelate                                                                                                | <i>Solidago decurrens</i>             |
| 44 | Nervolan A                                                                                                                 | <i>Inula nervosa</i> [33]             |
| 45 | 15-hydroxy-1(10),4,11(13)-germacatrien-12,6-olid-14-oic acid; (1(10, <i>E</i> ,4 <i>Z</i> ,6 $\alpha$ )-form, Me ester, Ac | <i>Oyedaea verbesinoides</i> [34]     |
| 46 | 2',3'-Isopropylideneobtusinin                                                                                              | <i>Pterocaulon alopecuroides</i> [35] |
| 47 | 5-(Hydroxymethyl)-7-methyl-6-(2,4,5-trimethoxyphenyl)-8-oxabicyclo[3.2.1]oct-3-en-2-one                                    | -                                     |
| 48 | Acorusin C                                                                                                                 | <i>Acorus tatarinowii</i> [36]        |
| 49 | Acortatarone A                                                                                                             | <i>Acorus tatarinowii</i> [36]        |
| 50 | 5-(Hydroxymethyl)-7-methyl-6-(2,4,5-trimethoxyphenyl)-8-oxabicyclo[3.2.1]oct-3-en-2-one; (1S,5S,6R,7S)-form                | -                                     |
| 51 | 3-Hydroxyviscidone                                                                                                         | <i>Gerbera saxatilis</i> [37]         |
| 52 | Ilexisochroman                                                                                                             | <i>Ilex pubescens</i> [38]            |
| 53 | 2,7'-Lignan-3,3',4,4',5,5'-hexol                                                                                           | -                                     |
| 54 | 2,7'-Lignan-3,3',4,4',5,5'-hexol, (R)-form                                                                                 | -                                     |
| 55 | 3,8'-Lignan-3',4,4',5,9,9'-hexol                                                                                           | -                                     |
| 56 | 3,8'-Lignan-3',4,4',5,9,9'-hexol, (R)-form                                                                                 | -                                     |
| 57 | 3,8'-Lignan-3',4,4',5,9,9'-hexol, (S)-form                                                                                 | -                                     |
| 58 | 3,8'-Lignan-3',4,4',5,9,9'-hexol, ( $\xi$ )-form                                                                           | -                                     |
| 59 | 8,8'-Lignan-2,2',4,4',5,5'-hexol                                                                                           | -                                     |
| 60 | 8,8'-Lignan-2,2',4,4',5,5'-hexol;(8R*,8'S*)-form                                                                           | -                                     |
| 61 | 8,8'-Lignan-2,2',4,4',5,5'-hexol;(8RS,8'SR)-form                                                                           | -                                     |
| 62 | 8,8'-Lignan-2,3',4,4',5,7'-hexol                                                                                           | -                                     |
| 63 | 8,8'-Lignan-2,3',4,4',5,7'-hexol;(7S,8S,8'R)-form                                                                          | -                                     |
| 64 | 8,8'-Lignan-2,3',4,4',5,7'-hexol;(8 $\xi$ ,8' $\xi$ )-form                                                                 | -                                     |
| 65 | 8,8'-Lignan-3,3',4,4',5,5'-hexol                                                                                           | -                                     |
| 66 | 8,8'-Lignan-3,3',4,4',5,5'-hexol;(8R,8'R)-form                                                                             | -                                     |
| 67 | 8,8'-Lignan-3,3',4,4',5,5'-hexol;(8RS,8'SR)-form                                                                           | -                                     |
| 68 | 8,8'-Lignan-3,3',4,4',5,5'-hexol;(8 $\xi$ ,8' $\xi$ )-form                                                                 | -                                     |
| 69 | 8,8'-Lignan-3,3',4,4',5,7'-hexol                                                                                           | -                                     |
| 70 | 8,8'-Lignan-3,3',4,4',5,7'-hexol;(7 $\xi$ ,8 $\xi$ ,8' $\xi$ )-form                                                        | -                                     |

|     |                                                                                                                     |                                                            |
|-----|---------------------------------------------------------------------------------------------------------------------|------------------------------------------------------------|
| 71  | 8,8'-Lignan-3,3',4,4',5,9'-hexol                                                                                    | -                                                          |
| 72  | 8,8'-Lignan-3,3',4,4',5,9'-hexol                                                                                    | -                                                          |
| 73  | 8,8'-Lignan-3,3',4,4',5,9'-hexol;(8S,8'R)-form                                                                      | -                                                          |
| 74  | 8,8'-Lignan-3,3',4,4',5,9'-hexol;(8S,8'R)-form                                                                      | -                                                          |
| 75  | 8,8'-Lignan-3,3',4,4',7,7'-hexol                                                                                    | -                                                          |
| 76  | 8,8'-Lignan-3,3',4,4',7,7'-hexol;(7RS,7'RS,8SR,8'SR)-form                                                           | -                                                          |
| 77  | 8,8'-Lignan-3,3',4,4',7,7'-hexol;(7RS,7'SR,8RS,8'RS)-form                                                           | -                                                          |
| 78  | 8,8'-Lignan-3,3',4,4',7,7'-hexol;(7S,7'S,8S,8'S)-form                                                               | -                                                          |
| 79  | 8,8'-Lignan-3,3',4,4',9,9'-hexol                                                                                    | -                                                          |
| 80  | 8,8'-Lignan-3,3',4,4',9,9'-hexol;(8R*,8'R*)-form                                                                    | -                                                          |
| 81  | 8,8'-Lignan-3,3',4,4',9,9'-hexol;(8R,8'R)-form                                                                      | -                                                          |
| 82  | 8,8'-Lignan-3,3',4,4',9,9'-hexol;(8R*,8'S*)-form                                                                    | -                                                          |
| 83  | 8,8'-Lignan-3,3',4,4',9,9'-hexol;(8RS,8'RS)-form                                                                    | -                                                          |
| 84  | 8,8'-Lignan-3,3',4,4',9,9'-hexol;(8RS,8'SR)-form                                                                    | -                                                          |
| 85  | 8,8'-Lignan-3,3',4,4',9,9'-hexol;(8S,8'S)-form                                                                      | -                                                          |
| 86  | 8,8'-Lignan-3,3',4,4',9,9'-hexol;(8 $\xi$ ,8' $\xi$ )-form                                                          | -                                                          |
| 87  | 8,8'-Lignan-3,3',5,5',7,7'-hexol                                                                                    | -                                                          |
| 88  | 8,8'-Lignan-3,3',5,5',7,7'-hexol;(7R*,7'R*,8R*,8'S*)-form                                                           | -                                                          |
| 89  | 2 $\beta$ -Hydroxynagilactone L                                                                                     | <i>Podocarpus nagi</i> [39]                                |
| 90  | 3 $\beta$ -Hydroxynagilactone L                                                                                     | <i>Podocarpus nagi</i> [39]                                |
| 91  | 15-Hydroxynagilactone L                                                                                             | <i>Podocarpus nagi</i> [39]                                |
| 92  | Laxiflorin U                                                                                                        | <i>Isodon eriocalyx</i> var. <i>laxiflora</i> [40]         |
| 93  | Andrographidoid D                                                                                                   | <i>Andrographis paniculata</i> [41]                        |
| 94  | Octandrenolone;3,4-Dihydro, 3 $\alpha$ ,4 $\beta$ -dihydroxy                                                        | <i>Melicope erromangensis</i> [42]                         |
| 95  | Octandrenolone;9,10-Dihydro, 9 $\alpha$ ,10 $\beta$ -dihydroxy                                                      | <i>Melicope erromangensis</i> [42]                         |
| 96  | Oncocalyxone D;11-Me ether(11 $\beta$ -)                                                                            | <i>Cordia oncocalyx</i> [43]                               |
| 97  | Oxirapentyne B                                                                                                      | <i>Isaria felina</i> (DC.) Fr [44]                         |
| 98  | Oxirapentyne C                                                                                                      | <i>Isaria felina</i> (DC.) Fr [44]                         |
| 99  | 4,8'-Oxylignan-3,3',4',7',9-pentol                                                                                  | -                                                          |
| 100 | 4,8'-Oxylignan-3,3',4',7',9-pentol;(7'R,8'R)-form                                                                   | -                                                          |
| 101 | 4,8'-Oxylignan-3,3',4',7',9-pentol;(7'R*,8'R*)-form                                                                 | -                                                          |
| 102 | 4,8'-Oxylignan-3,3',4',7',9-pentol;(7'R,8'S)-form                                                                   | -                                                          |
| 103 | 4,8'-Oxylignan-3,3',4',7',9-pentol;(7'R,8'S)-form                                                                   | -                                                          |
| 104 | 4,8'-Oxylignan-3,3',4',7',9-pentol;(7'S,8'S)-form                                                                   | -                                                          |
| 105 | 4,8'-Oxylignan-3,3',4',9,9'-pentol                                                                                  | -                                                          |
| 106 | 4,8'-Oxylignan-3,3',4',9,9'-pentol;(R)-form                                                                         | -                                                          |
| 107 | 4,8'-Oxylignan-3,3',4',9,9'-pentol;(S)-form                                                                         | -                                                          |
| 108 | 4,8'-Oxylignan-3,4',7',9,9'-pentol                                                                                  | -                                                          |
| 109 | 4,8'-Oxylignan-3,4',7',9,9'-pentol;(7'RS,8'RS)-form                                                                 | -                                                          |
| 110 | 4,8'-Oxylignan-3,4',7',9,9'-pentol;(7'RS,8'SR)-form                                                                 | -                                                          |
| 111 | Strebluslignan H                                                                                                    | <i>Streblus asper</i> [45]                                 |
| 112 | Streblusol D                                                                                                        | <i>Streblus asper</i> [46]                                 |
| 113 | tetrodecamycin                                                                                                      | <i>Streptomyces nashvillensis</i> MJ885-mF8 [47]           |
| 114 | 1,6,10-trihydroxy-7(11),8-eremophiladien-12,8-olide;(1 $\beta$ ,6 $\beta$ ,10 $\alpha$ )-form,1-Ketone, 6-propanoyl | <i>Senecio nemorensis</i>                                  |
| 115 | 8-Acryloylhydroxyisonobilin                                                                                         | <i>Anthemis nobilis</i> [48]                               |
| 116 | Combretastatin B1                                                                                                   | <i>Combretum caffrum</i> [49] and <i>Combretum kraussi</i> |

|     |                        |                                                                                                              |
|-----|------------------------|--------------------------------------------------------------------------------------------------------------|
| 117 | Bussealin B            | <i>Bussea sakalava</i> [50]                                                                                  |
| 118 | 11,12-Epoxyzearalenone | <i>Fusarium graminearum</i> [51]                                                                             |
| 119 | 4R-Hydroxyzearalenone  | <i>Fusarium</i> sp. PSU-ES123 [52]                                                                           |
| 120 | 5R-Hydroxyzearalenone  | <i>Gibberella zeae</i> , <i>Fusarium graminearum</i> and the marine-derived <i>Fusarium</i> sp. 05ABR26 [53] |
| 121 | 5S-Hydroxyzearalenone  | <i>Gibberella zeae</i> and <i>Fusarium graminearum</i> [51]                                                  |
| 122 | 6R-Hydroxyzearalenone  | <i>Fusarium</i> sp. PSU-ES123 [52]                                                                           |
| 123 | 8R-Hydroxyzearalenone  | <i>Fusarium</i> sp. PSU-ES73 [54]                                                                            |
| 124 | 8S-Hydroxyzearalenone  | <i>Fusarium</i> sp. PSU-ES123 [52]                                                                           |
| 125 | 10-Hydroxyzearalenone  | <i>Fusarium graminearum</i> [51]                                                                             |

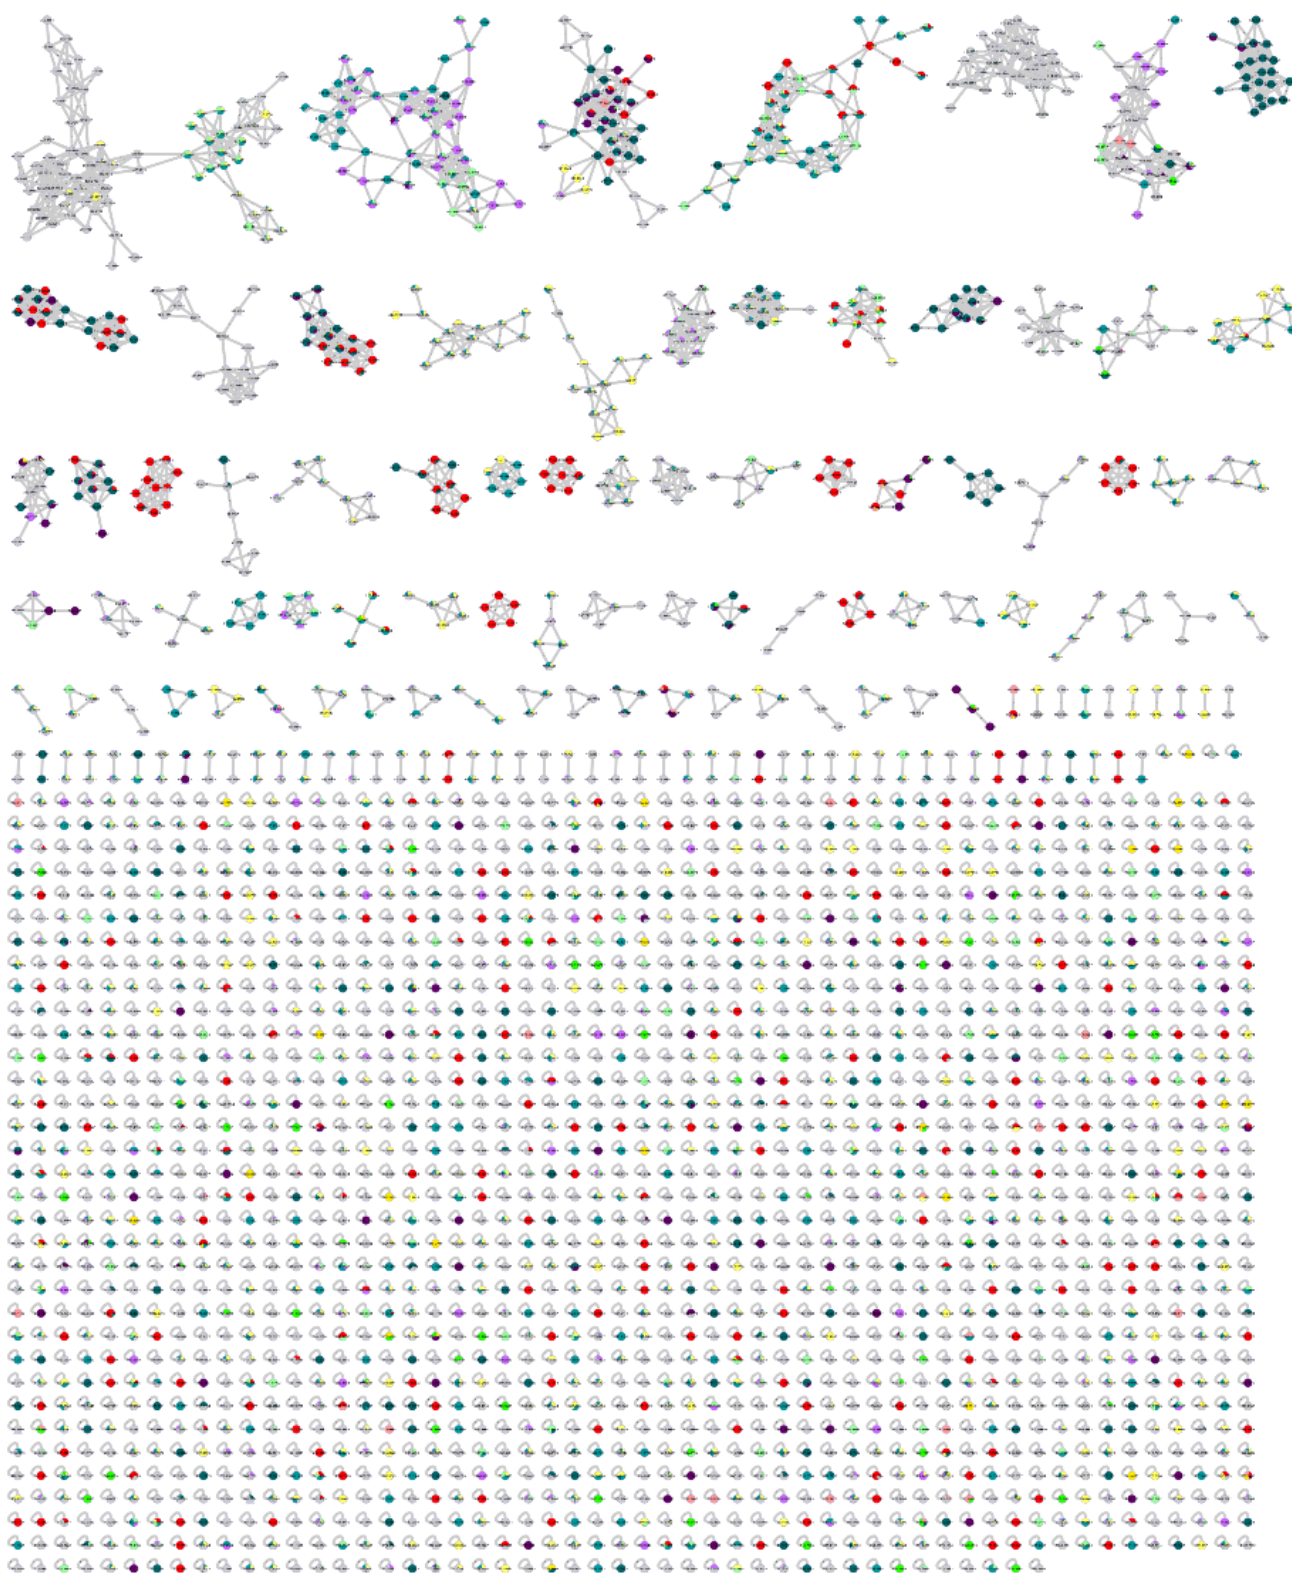

**Figure S1.** The molecular networking of the strain extracts from different condition cultures and the control extracts. Different culture condition is represented by different color code.

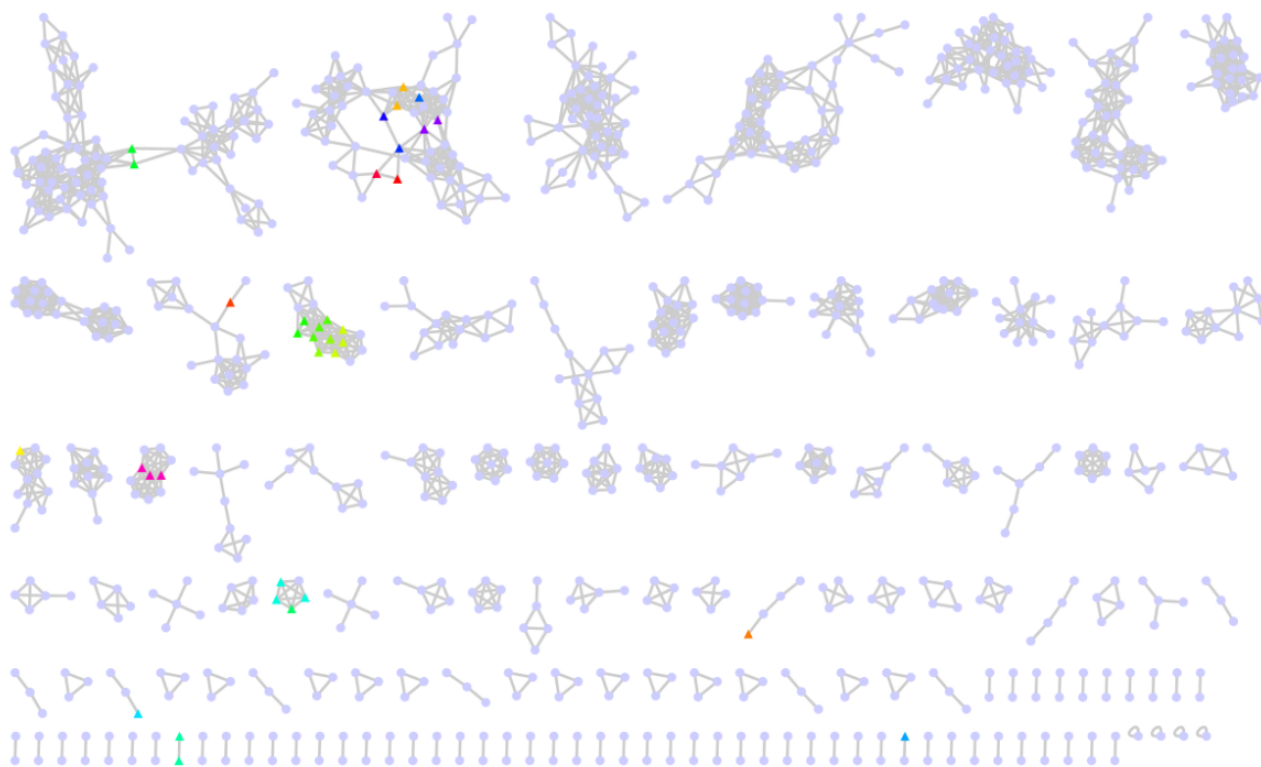

**Figure S2.** The molecular networking with dereplicated nodes that are mapped by rainbow color codes while others stayed purple.



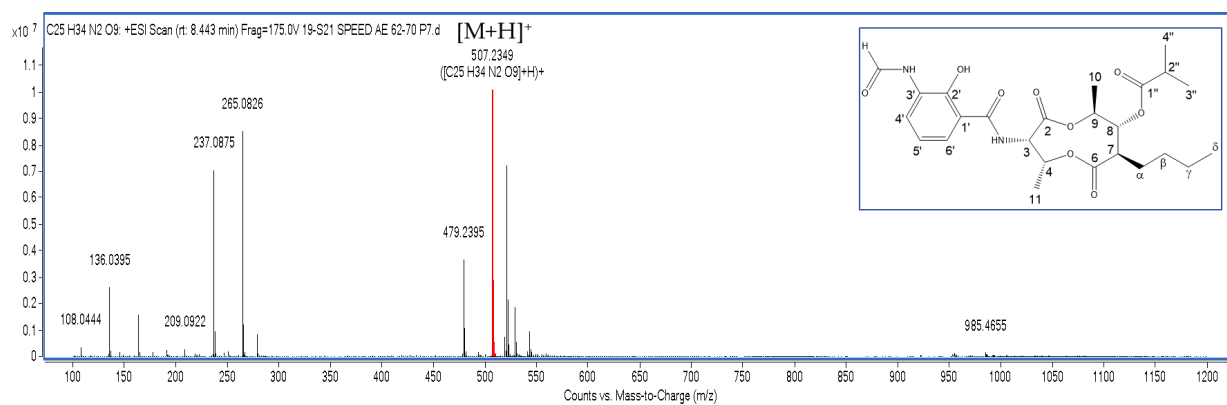

**Figure S3.** The HRESIMS spectrum of Antimycin A4a



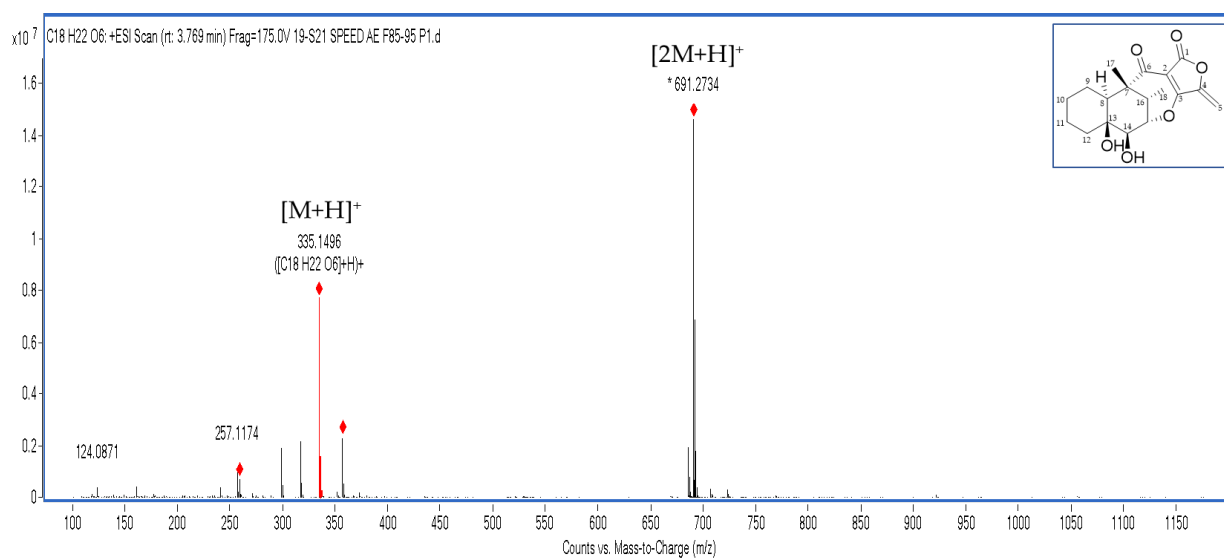

**Figure S5.** The HRESIMS spectrum of tetrodecamycin

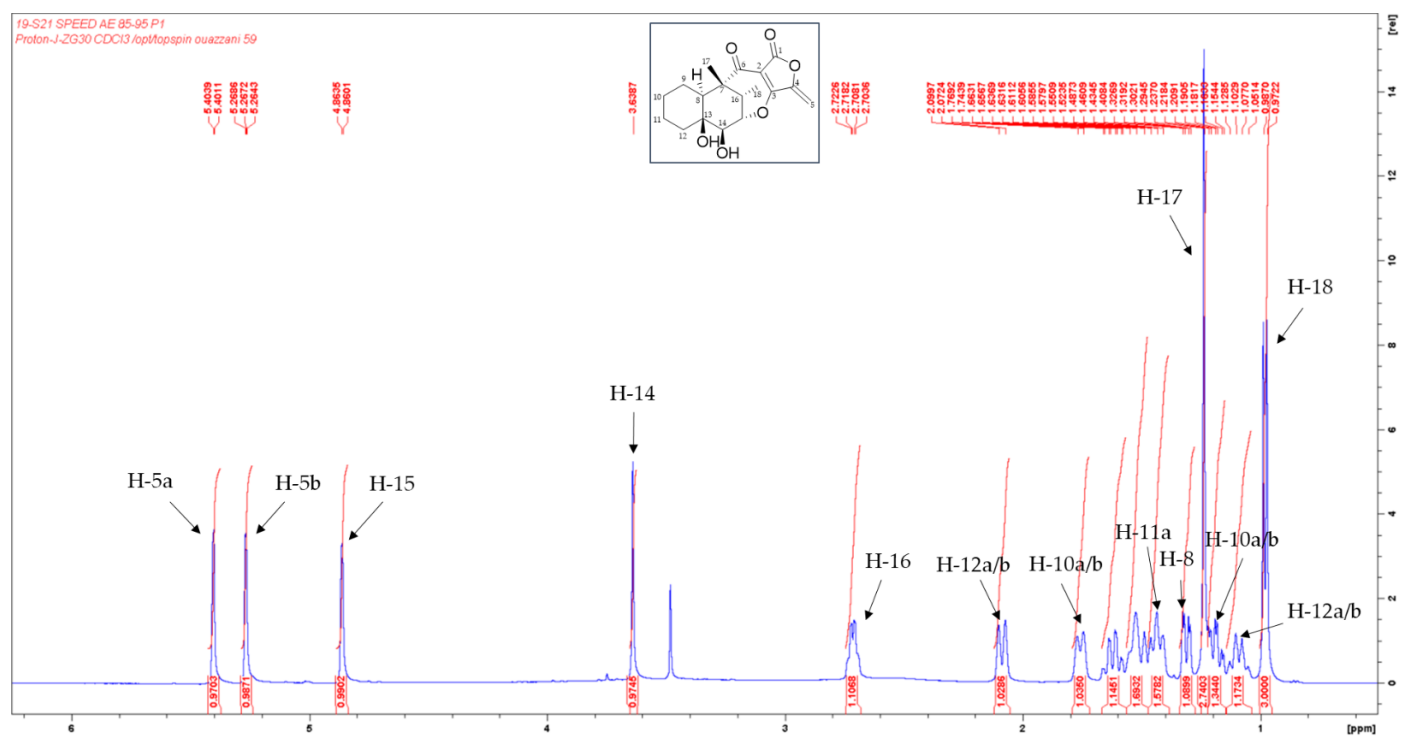

**Figure S6.**  $^1\text{H}$  NMR spectrum of tetrodecamycin in  $\text{CDCl}_3$  (500 MHz)

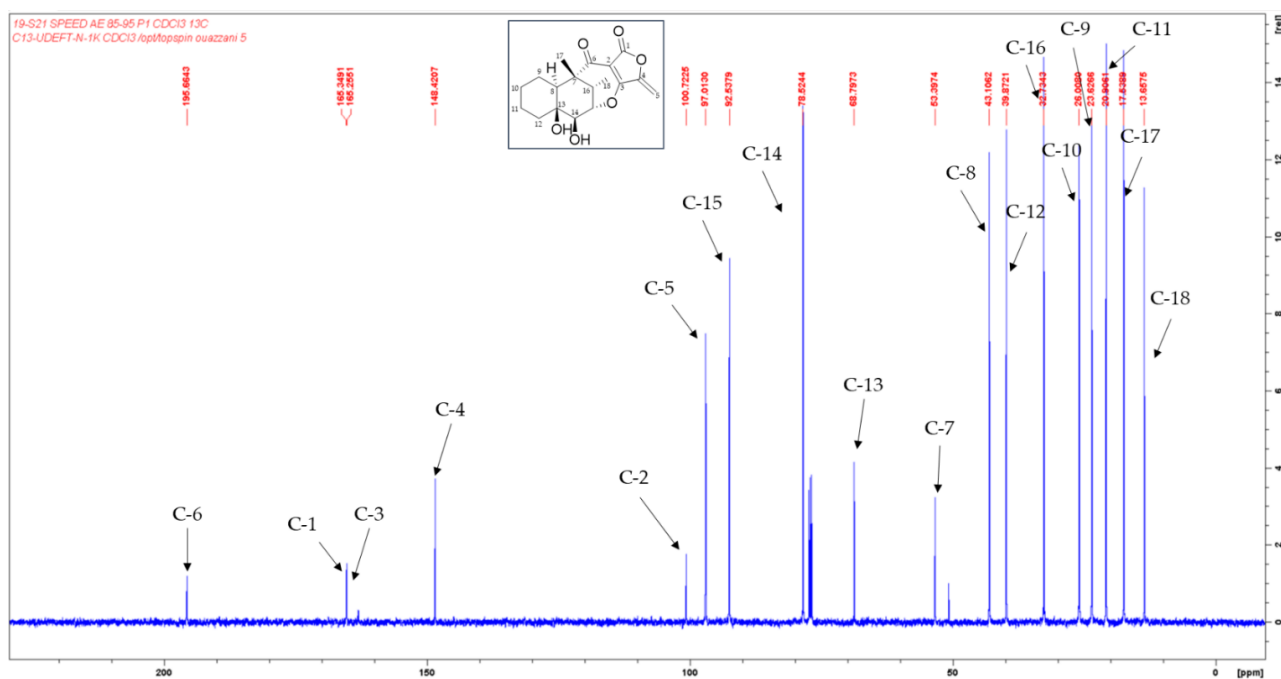

**Figure S7.** <sup>13</sup>C NMR spectrum of tetrodecamycin in CDCl<sub>3</sub> (125 MHz)

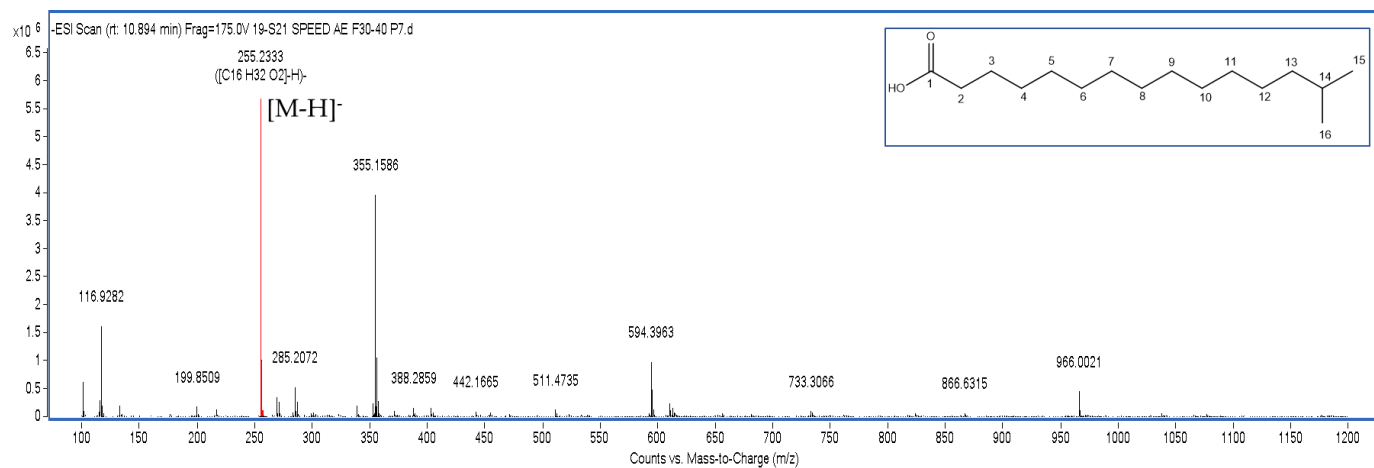

**Figure S8.** The HRESIMS spectrum of 14-methylpentadecanoic acid

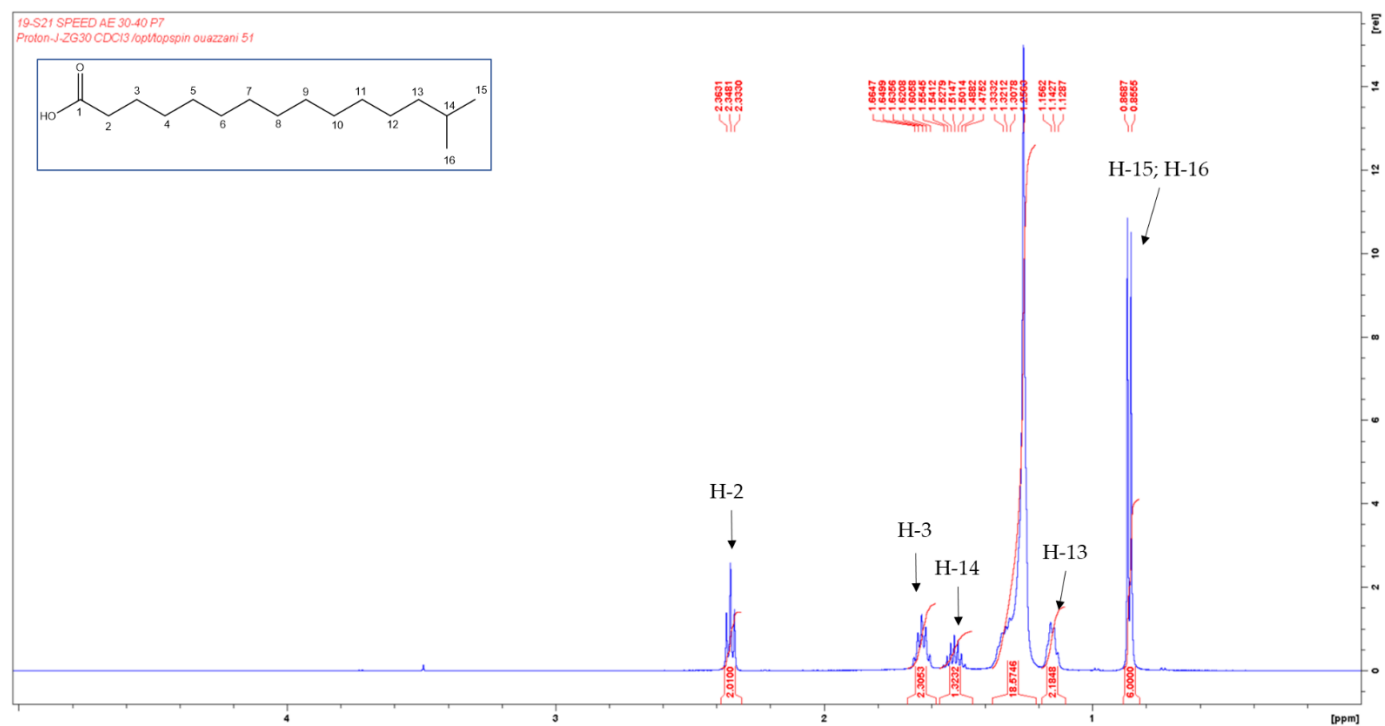

**Figure S9.**  $^1\text{H}$  NMR spectrum of 14-methylpentadecanoic acid in  $\text{CDCl}_3$  (500 MHz)

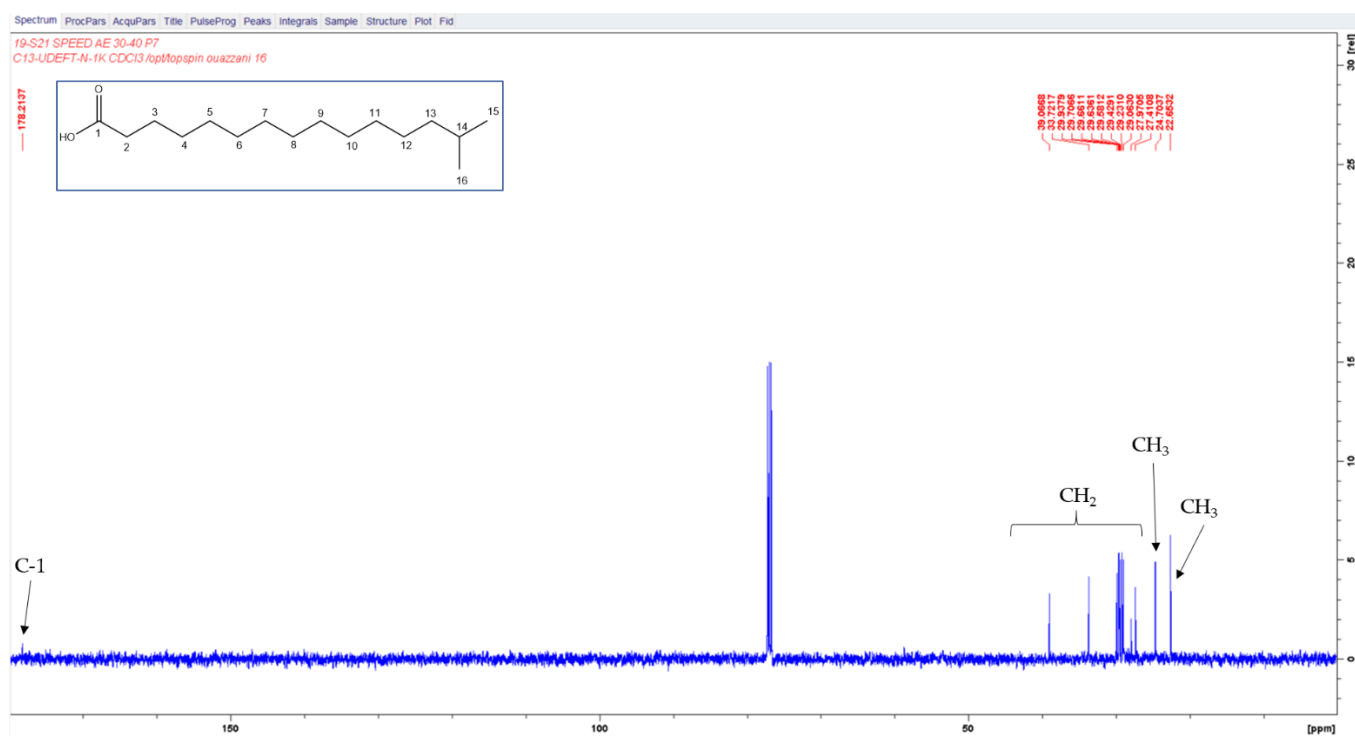

**Figure S10.**  $^{13}\text{C}$  NMR spectrum of 14-methylpentadecanoic acid in  $\text{CDCl}_3$  (125 MHz)



| SPEED tube                                                                          | Zoom                                                                                  |
|-------------------------------------------------------------------------------------|---------------------------------------------------------------------------------------|
|    |    |
|    |    |
|   |   |
|  |  |

**Figure S11.** Further SPEED pictures

## References

1. Takada, K.; Ninomiya, A.; Naruse, M.; Sun, Y.; Miyazaki, M.; Nogi, Y.; Okada, S.; Matsunaga, S., Surugamides A-E, cyclic octapeptides with four D-amino acid residues, from a marine Streptomyces sp.: LC-MS-aided inspection of partial hydrolysates for the distinction of D- and L-amino acid residues in the sequence. *The Journal of organic chemistry* **2013**, 78 (13), 6746-50.
2. Yamanaka, K.; Oikawa, H.; Ogawa, H. O.; Hosono, K.; Shinmachi, F.; Takano, H.; Sakuda, S.; Beppu, T.; Ueda, K., Desferrioxamine E produced by Streptomyces griseus stimulates growth and development of Streptomyces tanashiensis. *Microbiology* **2005**, 151 (Pt 9), 2899-2905.
3. Martinez, J. S.; Haygood, M. G.; Butler, A., Identification of a natural desferrioxamine siderophore produced by a marine bacterium. *Limnology and Oceanography* **2001**, 46 (2), 420-424.
4. Shaaban, K. A.; Singh, S.; Elshahawi, S. I.; Wang, X.; Ponomareva, L. V.; Sunkara, M.; Copley, G. C.; Hower, J. C.; Morris, A. J.; Kharel, M. K.; Thorson, J. S., Venturicidin C, a new 20-membered macrolide produced by Streptomyces sp. TS-2-2. *J Antibiot (Tokyo)* **2014**, 67 (3), 223-30.
5. Lee, H.-S.; Shin, H. J.; Jang, K. H.; Kim, T. S.; Oh, K.-B.; Shin, J., Cyclic Peptides of the Nocardamine Class from a Marine-Derived Bacterium of the Genus Streptomyces. *Journal of Natural Products* **2005**, 68 (4), 623-625.
6. Mortazavi, M.; Akbarzadeh, A., Improvement of Desferrioxamine B Production of Streptomyces pilosus ATCC 19797 With Use of Protease Inhibitor and Minerals Related to Its Activity. *Indian journal of clinical biochemistry : IJCB* **2012**, 27 (3), 274-7.
7. Barrow, C. J.; Oleynek, J. J.; Marinelli, V.; Sun, H. H.; Kaplita, P.; Sedlock, D. M.; Gillum, A. M.; Chadwick, C. C.; Cooper, R., Antimycins, inhibitors of ATP-citrate lyase, from a Streptomyces sp. *J Antibiot (Tokyo)* **1997**, 50 (9), 729-33.
8. Datta, S. C.; Ghosh, J. J., Effect of citreoviridin, a toxin from Penicillium citreoviride NRRL 2579, on glycogen metabolism of rat brain. *Toxicon* **1981**, 19 (2), 217-222.
9. Wronska, A. K.; Bogus, M. I., Harman and norharman, metabolites of the entomopathogenic fungus Conidiobolus coronatus (Entomophthorales), affect the serotonin levels and phagocytic activity of hemocytes, insect immunocompetent cells, in Galleria mellonella (Lepidoptera). *Cell & bioscience* **2019**, 9, 29.
10. Wattana-Amorn, P.; Charoenwongsa, W.; Williams, C.; Crump, M. P.; Apichaisataienchote, B., Antibacterial activity of cyclo(L-Pro-L-Tyr) and cyclo(D-Pro-L-Tyr) from Streptomyces sp. strain 22-4 against phytopathogenic bacteria. *Natural product research* **2016**, 30 (17), 1980-1983.
11. Isaka, M.; Suyarnsestakorn, C.; Tanticharoen, M.; Kongsaree, P.; Thebtaranonth, Y., Aigialomycins A-E, New Resorcylic Macrolides from the Marine Mangrove Fungus Aigialus parvus. *The Journal of organic chemistry* **2002**, 67 (5), 1561-1566.
12. Wu, Z.; Lai, Y.; Zhou, L.; Wu, Y.; Zhu, H.; Hu, Z.; Yang, J.; Zhang, J.; Wang, J.; Luo, Z.; Xue, Y.; Zhang, Y., Enantiomeric Lignans and Neolignans from Phyllanthus glaucus: Enantioseparation and Their Absolute Configurations. *Scientific reports* **2016**, 6, 24809.
13. Majumder, P. L.; Pal, S., Cumulatin and tristin, two bibenzyl derivatives from the orchids Dendrobium cumulatum and Bulbophyllum triste. *Phytochemistry* **1993**, 32 (6), 1561-1565.
14. Szwabbe, A. J.; Williams, K.; O'Flynn, D. E.; Bailey, A. M.; Mulholland, N. P.; Vincent, J. L.; Willis, C. L.; Cox, R. J.; Simpson, T. J., Novel nonadride, heptadride and maleic acid metabolites from the byssochlamic acid producer Byssochlamys fulva IMI 40021 - an insight into the biosynthesis of maleidrides. *Chemical communications* **2015**, 51 (96), 17088-91.
15. Li, L. M.; Zou, Q.; Li, G. Y., Chromones from an ascomycete, Chaetomium aureus. *Chinese Chemical Letters* **2010**, 21 (10), 1203-1205.
16. Huang, H.; Feng, X.; Xiao, Z. e.; Liu, L.; Li, H.; Ma, L.; Lu, Y.; Ju, J.; She, Z.; Lin, Y., Azaphilones and p-Terphenyls from the Mangrove Endophytic Fungus Penicillium chermesinum (ZH4-E2) Isolated from the South China Sea. *Journal of Natural Products* **2011**, 74 (5), 997-1002.
17. Pettit, G. R.; Cragg, G. M.; Herald, D. L.; Schmidt, J. M.; Lohavanijaya, P., Isolation and structure of combretastatin. *Canadian Journal of Chemistry* **1982**, 60 (11), 1374-1376.
18. Achenbach, H.; Mühlenfeld, A.; Brillinger, G. U., Stoffwechselprodukte von Mikroorganismen, XXX. Phthalide und Chromanole aus Aspergillus duricaulis. *Liebigs Annalen der Chemie* **1985**, 1985 (8), 1596-1628.
19. Paranagama, P. A.; Wijeratne, E. M. K.; Gunatilaka, A. A. L., Uncovering Biosynthetic Potential of Plant-Associated Fungi: Effect of Culture Conditions on Metabolite Production by Paraphaeosphaeria quadrisepata and Chaetomium chiversii. *Journal of Natural Products* **2007**, 70 (12), 1939-1945.
20. Gao, J.; Radwan, M. M.; Leon, F.; Dale, O. R.; Husni, A. S.; Wu, Y.; Lupien, S.; Wang, X.; Manly, S. P.; Hill, R. A.; Dugan, F. M.; Cutler, H. G.; Cutler, S. J., Neocosmospora sp.-derived resorcylic acid lactones with in vitro binding affinity for human opioid and cannabinoid receptors. *J Nat Prod* **2013**, 76 (5), 824-8.
21. Ayer, W. A.; Lee, S. P.; Tsuneda, A.; Hiratsuka, Y., The isolation, identification, and bioassay of the antifungal metabolites produced by Monocillium nordinii. *Canadian Journal of Microbiology* **1980**, 26 (7), 766-773.

22. Xu, L.; Wu, P.; Xue, J.; Molnar, I.; Wei, X., Antifungal and Cytotoxic beta-Resorcylic Acid Lactones from a Paecilomyces Species. *J Nat Prod* **2017**, *80* (8), 2215-2223.
23. Wang, X. R.; Wu, Q. X.; Shi, Y. P., Terpenoids and sterols from Saussurea cauloptera. *Chemistry & biodiversity* **2008**, *5* (2), 279-89.
24. Wu, W.; Bi, X.-L.; Cao, J.-Q.; Zhang, K.-Q.; Zhao, Y.-Q., New antitumor compounds from Carya cathayensis. *Bioorganic & Medicinal Chemistry Letters* **2012**, *22* (5), 1895-1898.
25. Ito, M.; Matsuzaki, K.; Wang, J.; Daikonya, A.; Wang, N. L.; Yao, X. S.; Kitanaka, S., New phenanthrenes and stilbenes from Dendrobium loddigesii. *Chemical & pharmaceutical bulletin* **2010**, *58* (5), 628-33.
26. Zhang, X.; Gao, H.; Wang, N.-L.; Yao, X.-S., Three new bibenzyl derivatives from Dendrobium nobile. *Journal of Asian Natural Products Research* **2006**, *8* (1-2), 113-118.
27. Wang, Y. X.; Ren, Q.; Yan, Z. Y.; Wang, W.; Zhao, L.; Bai, M.; Wang, X. B.; Huang, X. X.; Song, S. J., Flavonoids and their derivatives with beta-amyloid aggregation inhibitory activity from the leaves and twigs of Pithecellobium clypearia Benth. *Bioorg Med Chem Lett* **2017**, *27* (21), 4823-4827.
28. Wang, L. Q.; Wu, M. M.; Liu, J. P.; Li, Y.; Hua, Y.; Wang, Y. Y.; Li, X. Y.; Chen, Y. G.; Wang, J. H., Five new diarylpropan-1-ols from Combretum yunnanense. *Planta medica* **2011**, *77* (16), 1841-4.
29. Seca, A. M. L.; Silva, A. M. S.; Silvestre, A. J. D.; Cavaleiro, J. A. S.; Domingues, F. M. J.; Pascoal-Neto, C., Lignanamides and other phenolic constituents from the bark of kenaf (Hibiscus cannabinus). *Phytochemistry* **2001**, *58* (8), 1219-1223.
30. Bohlmann, F.; Singh, P.; Jakupovic, J.; Robinson, H.; King, R. M., An epoxygermacranolide and further constituents from Mikania species. *Phytochemistry* **1982**, *21* (3), 705-707.
31. Hammerschmidt, L.; Debbab, A.; Ngoc, T. D.; Wray, V.; Hemphil, C. P.; Lin, W.; Broetz-Oesterhelt, H.; Kassack, M. U.; Proksch, P.; Aly, A. H., Polyketides from the mangrove-derived endophytic fungus Acremonium strictum. *Tetrahedron Letters* **2014**, *55* (24), 3463-3468.
32. Hosoe, T.; Fukushima, K.; Itabashi, T.; Nozawa, K.; Takizawa, K.; Okada, K.; Takaki, G. M.; Kawai, K., A new nonadride derivative, dihydroepihevadride, as characteristic antifungal agent against filamentous fungi, isolated from unidentified fungus IFM 52672. *J Antibiot (Tokyo)* **2004**, *57* (9), 573-8.
33. Yan, L.; Huang, Y.; Fu, J.-J.; Qin, J.-J.; Zeng, Q.; Zhu, Y.; Yan, S. K.; Zhang, W.-D.; Jin, H.-Z., Three New Phenylpropanoids from Inula nervosa Wall. *Helvetica Chimica Acta* **2010**, *93* (7), 1418-1421.
34. Stokes, S.; Castro, V.; Poveda, L.; Papastergiou, F.; Jakupovic, J., Melampolides from Oyedaea verbesinoides. *Phytochemistry* **1992**, *31* (8), 2894-2896.
35. Alarcón, R.; Pacciaroni, A.; Peñaloza, L.; Uriburu, M. L.; Boemo, A.; Sosa, V., Phenolic compounds from Pterocaulon alopecuroides. *Biochemical Systematics and Ecology* **2010**, *38* (5), 1059-1064.
36. Ni, G.; Shi, G. R.; Zhang, D.; Fu, N. J.; Yang, H. Z.; Chen, X. G.; Yu, D. Q., Cytotoxic Lignans and Sesquiterpenoids from the Rhizomes of Acorus tatarinowii. *Planta medica* **2016**, *82* (7), 632-8.
37. Chen, Y.-J.; Li, Y.; Chen, J.-J.; Gao, K., Benzofuran Derivatives from Gerbera saxatilis. *Helvetica Chimica Acta* **2007**, *90* (1), 176-182.
38. Lin, L.-P.; Kong, X.; Chen, L.; Chen, L., Chemical constituents from the roots of cultivated Ilex pubescens. *Biochemical Systematics and Ecology* **2019**, *82*, 13-15.
39. Feng, Z. L.; Zhang, L. L.; Zheng, Y. D.; Liu, Q. Y.; Liu, J. X.; Feng, L.; Huang, L.; Zhang, Q. W.; Lu, J. J.; Lin, L. G., Norditerpenoids and Dinorditerpenoids from the Seeds of Podocarpus nagi as Cytotoxic Agents and Autophagy Inducers. *J Nat Prod* **2017**, *80* (7), 2110-2117.
40. Wang, W.-G.; Du, X.; Li, X.-N.; Yan, B.-C.; Zhou, M.; Wu, H.-Y.; Zhan, R.; Dong, K.; Pu, J.-X.; Sun, H.-D., Four new diterpenoids from Isodon eriocalyx var. laxiflora. *Natural products and bioprospecting* **2013**, *3* (4), 145-149.
41. Xu, C.; Chou, G. X.; Wang, C. H.; Wang, Z. T., Rare noriridoids from the roots of Andrographis paniculata. *Phytochemistry* **2012**, *77*, 275-9.
42. Muyard, F.; Bissoe, A. N.; Bevalot, F.; Tillequin, F.; Cabalion, P.; Vaquette, J., Acetophenones and other constituents from the roots of Melicope erromangensis. *Phytochemistry* **1996**, *42* (4), 1175-1179.
43. Matos, T. S.; Silva, A. K. O.; Quintela, A. L.; Francisco das Chagas Pinto, L.; Canuto, K. M.; Braz-Filho, R.; Fonseca, M. J. S.; Luna-Costa, A. M.; Paz, I. A.; Nascimento, N. R. F.; Silveira, E. R.; Pessoa, O. D. L., Neuroinhibitory meroterpenoid compounds from Cordia oncocalyx. *Fitoterapia* **2017**, *123*, 65-72.
44. Smetanina, O. F.; Yurchenko, A. N.; Afiyatullo, S. S.; Kalinovskiy, A. I.; Pushilin, M. A.; Khudyakova, Y. V.; Slinkina, N. N.; Ermakova, S. P.; Yurchenko, E. A., Oxirapentyns B-D produced by a marine sediment-derived fungus Isaria felina (DC.) Fr. *Phytochemistry Letters* **2012**, *5* (1), 165-169.
45. Chen, H.; Li, J.; Wu, Q.; Niu, X. T.; Tang, M. T.; Guan, X. L.; Li, J.; Yang, R. Y.; Deng, S. P.; Su, X. J., Anti-HBV activities of Streblus asper and constituents of its roots. *Fitoterapia* **2012**, *83* (4), 643-9.
46. Li, J.; Huang, Y.; Guan, X. L.; Li, J.; Deng, S. P.; Wu, Q.; Zhang, Y. J.; Su, X. J.; Yang, R. Y., Anti-hepatitis B virus constituents from the stem bark of Streblus asper. *Phytochemistry* **2012**, *82*, 100-9.

47. Tsuchida, T.; Iinuma, H.; Nishida, C.; Kinoshita, N.; Sawa, T.; Hamada, M.; Takeuchi, T., Tetrodecamycin and dihydrotetrodecamycin, new antimicrobial antibiotics against *Pasteurella piscicida* produced by *Streptomyces nashvillensis* MJ885-mF8. I. Taxonomy, fermentation, isolation, characterization and biological activities. *J Antibiot (Tokyo)* **1995**, *48* (10), 1104-9.
48. De Mieri, M.; Monteleone, G.; Ismajili, I.; Kaiser, M.; Hamburger, M., Antiprotozoal Activity-Based Profiling of a Dichloromethane Extract from *Anthemis nobilis* Flowers. *J Nat Prod* **2017**, *80* (2), 459-470.
49. Pettit, G. R.; Singh, S. B.; Niven, M. L.; Hamel, E.; Schmidt, J. M., Isolation, Structure, and Synthesis of Combretastatins A-1 and B-1, Potent New Inhibitors of Microtubule Assembly, Derived from *Combretum caffrum*. *Journal of Natural Products* **1987**, *50* (1), 119-131.
50. Pan, E.; Harinantenaina, L.; Brodie, P. J.; Miller, J. S.; Callmander, M. W.; Rakotonandrasana, S.; Rakotobe, E.; Rasamison, V. E.; Kingston, D. G. I., Four Diphenylpropanes and a Cycloheptadibenzofuran from *Bussea sakalava* from the Madagascar Dry Forest. *Journal of Natural Products* **2010**, *73* (11), 1792-1795.
51. Shen, W.; Mao, H.; Huang, Q.; Dong, J., Benzenediol lactones: a class of fungal metabolites with diverse structural features and biological activities. *European journal of medicinal chemistry* **2015**, *97*, 747-77.
52. Saetang, P.; Rukachaisirikul, V.; Phongpaichit, S.; Sakayaroj, J.; Shi, X.; Chen, J.; Shen, X.,  $\beta$ -Resorcylic macrolide and octahydronaphthalene derivatives from a seagrass-derived fungus *Fusarium* sp. PSU-ES123. *Tetrahedron* **2016**, *72* (41), 6421-6427.
53. Zhao, L. L.; Gai, Y.; Kobayashi, H.; Hu, C. Q.; Zhang, H. P., 5'-Hydroxyzearalenol, a new  $\beta$ -resorcylic macrolide from *Fusarium* sp. 05ABR26. *Chinese Chemical Letters* **2008**, *19* (9), 1089-1092.
54. Supaphon, P.; Arunpanichlert; Rukachaisirikul; Sukpondma, Y.; Phongpaichit; Supaphon; Sakayaroj, O., A  $\beta$ -resorcylic macrolide from the seagrass-derived fungus *Fusarium* sp. PSU-ES73, *Arch. Pharm. Res.* 2016.
